# Supplementary material for: Genome-wide identification and characterization of Long Non-Coding RNA in barley roots in response to Piriformospora indica colonization
Source: Research Square preprint supplement (doi:10.21203/rs.3.rs-1569030/v1), 2022-05-23
Supplement: Supplementary file 1 [file f46b84b61be97e049f763f16.docx]

**Supplementary data**

Fig. S1. The flowchart for identifying the lncRNAs in barley roots infected by *P. indica.*

Fig. S2. The PCA of lncRNA from RNA-seq.

Fig. S3. Identification of the differential expression of lncRNAs by qRT-PCR.

Fig. S4. The different expressed lncRNA enriched in KEEG pathway for the three comparison Groups.

Fig. S5. Target gene (XLOC_223177) encode a ribosomal protein (S3Ae) analyzed by KEGG pathway.

Table S1. The assembled clean reads were mapped to barley genome using Hisat.

Table S2. The saturation of lncRNA from RNA-seq measured by RSeQC.

Table S3. Primers used for different expressed Lnc-RNA identification.

Table S4. The correlation of DELs and target mRNA (lncRNA-mRNA co-expressed) in 3 dai to mock comparison group.

Table S5. The correlation of DELs and target mRNA (lncRNA-mRNA co-expressed) in 7 dai to mock comparison group.

Table S6. The correlation of DELs and target mRNA (lncRNA-mRNA co-expressed) in 7 dai to 3 dai comparison group.

Table S7. The lncRNA-miRNA co-expression correlation analysis.

Table S8. The miRNA-mRNA co-expression correlation analysis.

Table S9. The significant up-regulated in GO terms in 3 dai to mock comparison group.

Table S10. The significant up-regulated in GO terms in 7 dai to mock comparison group.

Table S11. The significant up-regulated in GO terms in 3 dai to 7 dai comparison group.

Table S12.The significant down-regulated lncRNAs in GO terms in 3 dai to mock comparison group.

Table S13. The significant down-regulated lncRNAs in GO terms in 7 dai to mock comparison group.

Table S14. The significant down-regulated lncRNAs in GO terms in 7 dai to 3 dai comparison group.

Table S15. Specific primers used for the selected gene fragments quantitative Real-time PCR analysis.
